# Supplementary material for: Memantine Inhibits Calcium-Permeable AMPA Receptors
Source: PubMed Central journal article supplement — bioRxiv. 2024 Jul 4:2024.07.02.601784. Preprint. [Version 1] doi: 10.1101/2024.07.02.601784 (PMC11245036; doi:10.1101/2024.07.02.601784), 2024-07-04
Supplement: NIHPP2024.07.02.601784v1-supplement-1.pdf [file NIHPP2024.07.02.601784v1-supplement-1.pdf]

721 **Supplementary Information**

722 Figures S1-S9

723 Table S2

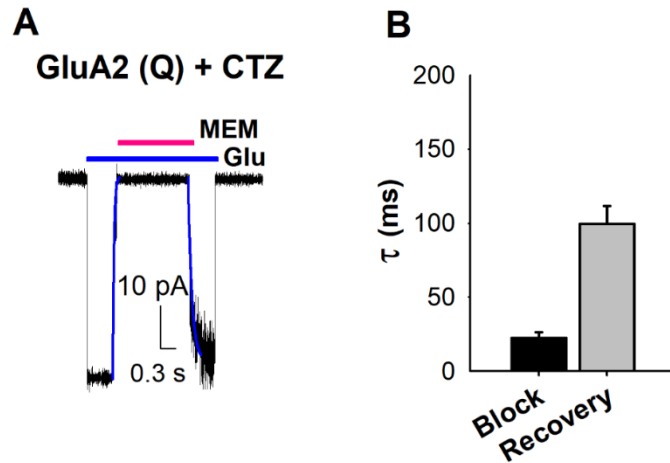

724

725 **Fig. S1. Time course of memantine inhibition.** (A) Time course of the inhibition and recovery  
726 by 500  $\mu$ M of memantine (MEM) in the presence of 10 mM glutamate and 100  $\mu$ M CTZ. The  
727 inhibition and recovery phases were fitted to a single exponential function. (B) Bar graph  
728 showing the fits for the inhibition and recovery of memantine inhibition (n=6).

729

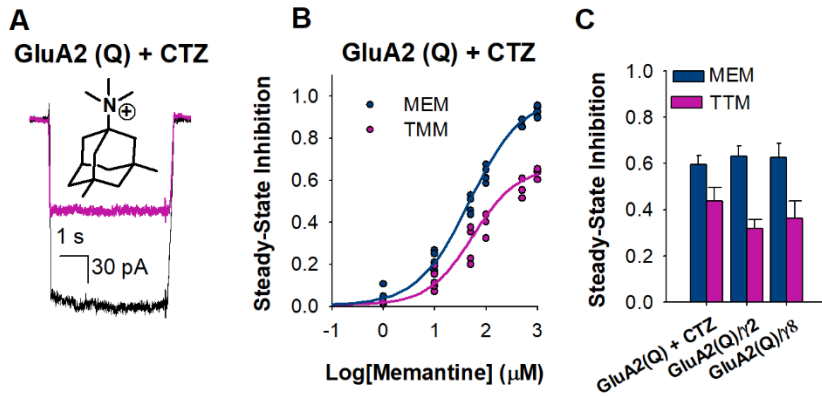

730

731 **Fig. S2. Memantine versus TMM inhibition of CP-AMPA receptors.** (A) Chemical structure of  
732 trimethylmemantine (TMM), and representative GluA2 (Q) + CTZ current traces due to 10 mM  
733 glutamate in the absence (black) and presence of 500 μM TMM (pink). (B) The dose-dependent  
734 inhibitory effects of memantine (MEM) (•) and TMM (•) on GluA2 (Q) in the presence of CTZ,  
735 with  $IC_{50}$   $48 \pm 3$  μM and  $384 \pm 8$  μM, respectively. Each dot represents data from a different  
736 cell. (C) Comparison of inhibition by 100 μM of Memantine and TMM inhibition for  
737 GluA2(Q)+CTZ, GluA2(Q)/γ2, and GluA2(Q)/γ8, ( $n \geq 4$ ).

738

739

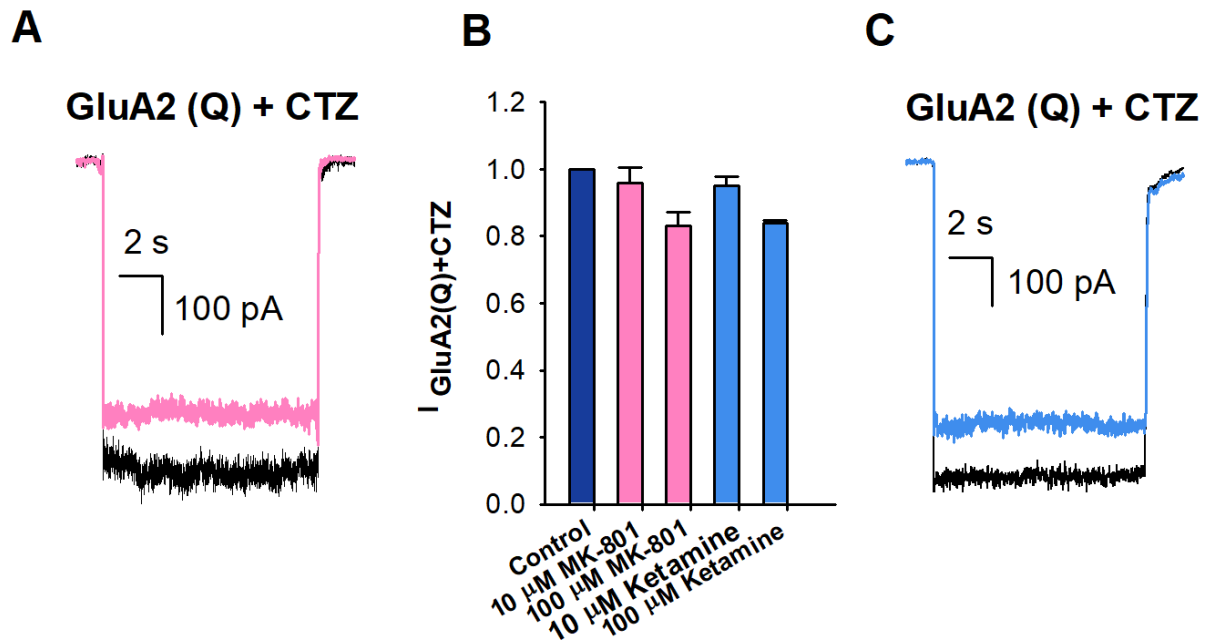

740

741 **Figure S3. MK-801 and Ketamine responses to GluA2 (Q).** (A) Representative whole-cell  
742 recordings in response to 10 mM glutamate alone (black) or in the presence of 100 $\mu\text{M}$  of MK-  
743 801 (pink). (B) Comparison of inhibition of 10 mM glutamate (dark blue) by 10 and 100  $\mu\text{M}$  of  
744 MK-801 (pink); and 10 and 100  $\mu\text{M}$  of Ketamine (blue). (C) Representative whole-cell  
745 recordings in response to 10 mM glutamate alone (black) or in the presence of 100 $\mu\text{M}$  of  
746 Ketamine (blue). ( $n \geq 4$ )

747

748

749

750

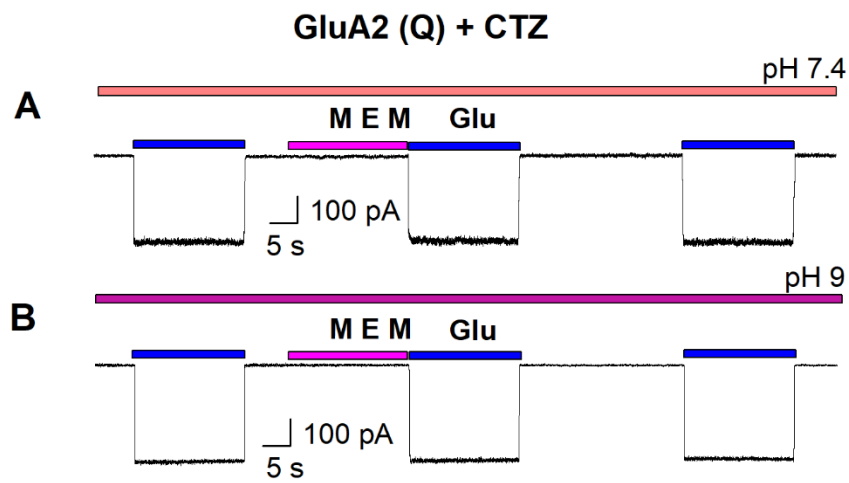

751

752 **Fig. S4. Representative current traces of memantine (MEM) inhibition showing rapid on**  
753 **and off rates.** Current traces of memantine inhibition showing rapid on and off rates at pH 7.4  
754 (A) and at pH 9.0 (B).

755

756

757

758

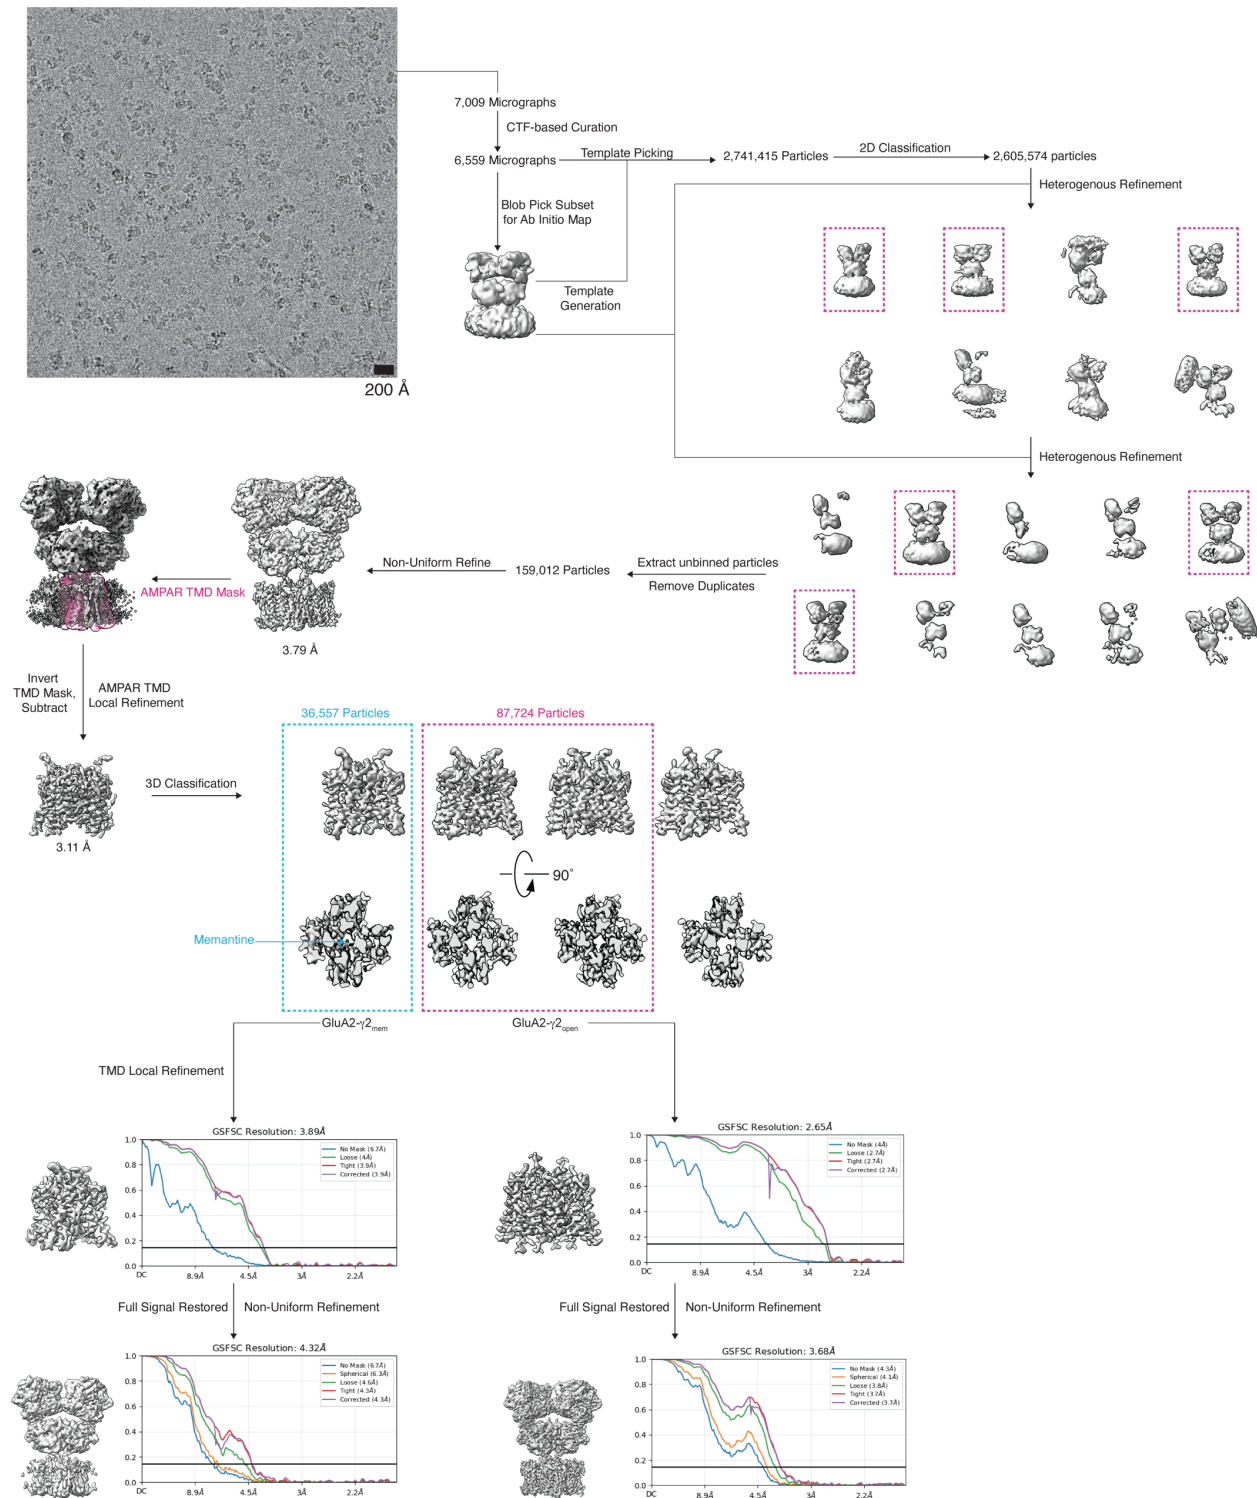

759

760

761 **Fig. S5. Cryo-EM processing workflow in CryoSPARC.**

762

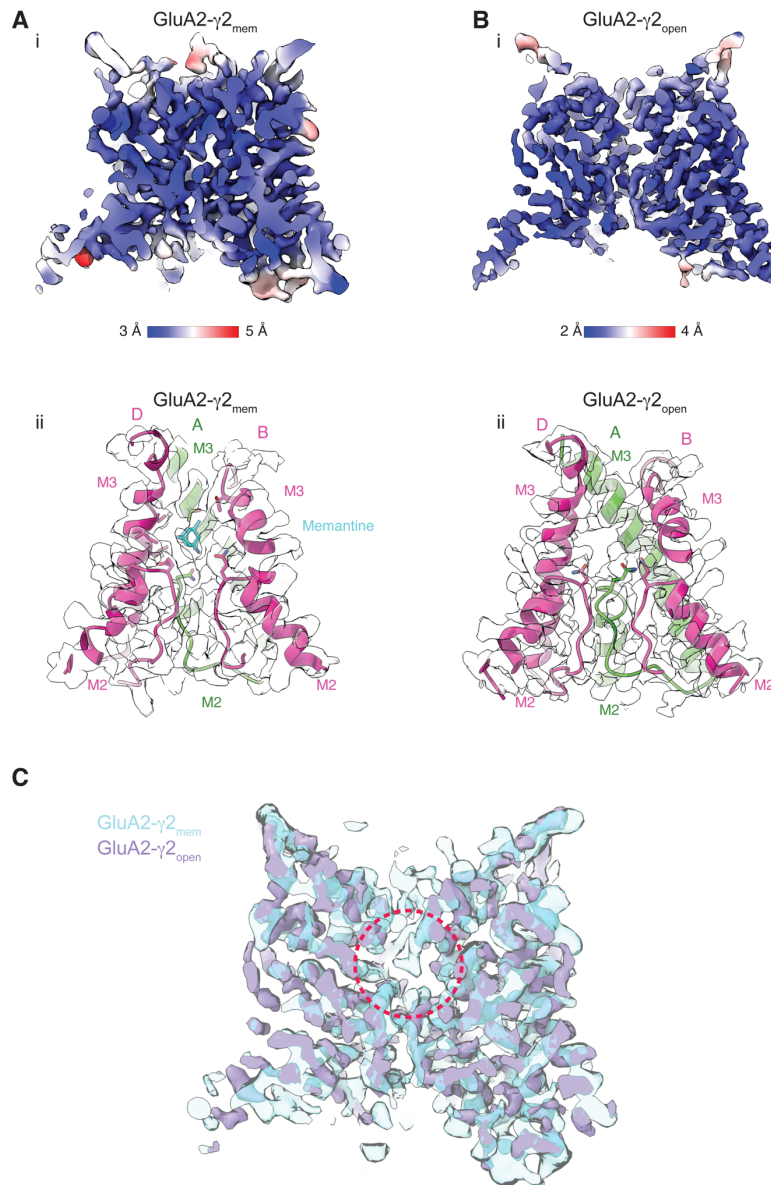

763

764

765 **Figure S6. Local refinement maps and details for GluA2-γ2<sub>mem</sub> and GluA2-γ2<sub>open</sub>.** (A) Inset  
766 i, GluA2-γ2<sub>mem</sub> local resolution map, colored blue (3.0 Å) to red (5.0 Å). Inset ii, GluA2-γ2<sub>mem</sub>  
767 pore model fit into locally refined map. Subunit C omitted for clarity. (B) Inset i, GluA2-γ2<sub>open</sub>  
768 local resolution map, colored blue (2.0 Å) to red (4.0 Å). Inset ii, GluA2-γ2<sub>open</sub> pore model fit  
769 into locally refined map. Subunit C is omitted for clarity. (C) Overlay of GluA2-γ2<sub>mem</sub> (cyan,  
770 transparent) and GluA2-γ2<sub>open</sub> (purple) local maps. Red dashed circle indicates the memantine  
771 binding site.

772

773

774

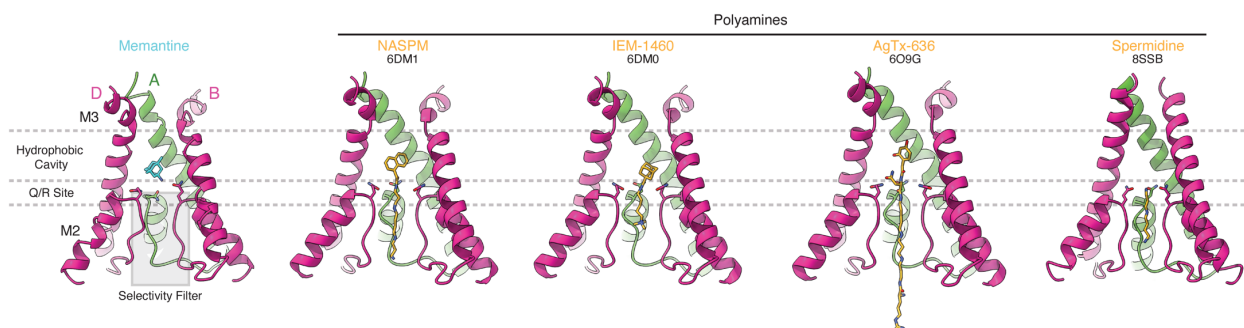

775

776

777 **Figure S7. Comparison of memantine block to polyamine block.** Polyamines are shown in  
778 yellow, memantine in cyan. Both are shown as sticks. Carbon molecules are colored the same as  
779 the molecule, nitrogen atoms blue, oxygen atoms red. Nitrogens in polyamine tails are directly  
780 coordinated by the selectivity filter and Q/R site, and polyamine derivatives or toxins (e.g.,  
781 NASPM – pdb 6DM1, IEM-1460 – pdb 6DM0, AgTx-636 – pdb 6O9G) have a hydrophobic  
782 head above the polyamine tail that sits in the hydrophobic cavity. Spermidine (pdb 8SSB) sits  
783 directly at the Q/R site and within the selectivity filter below.

784



785

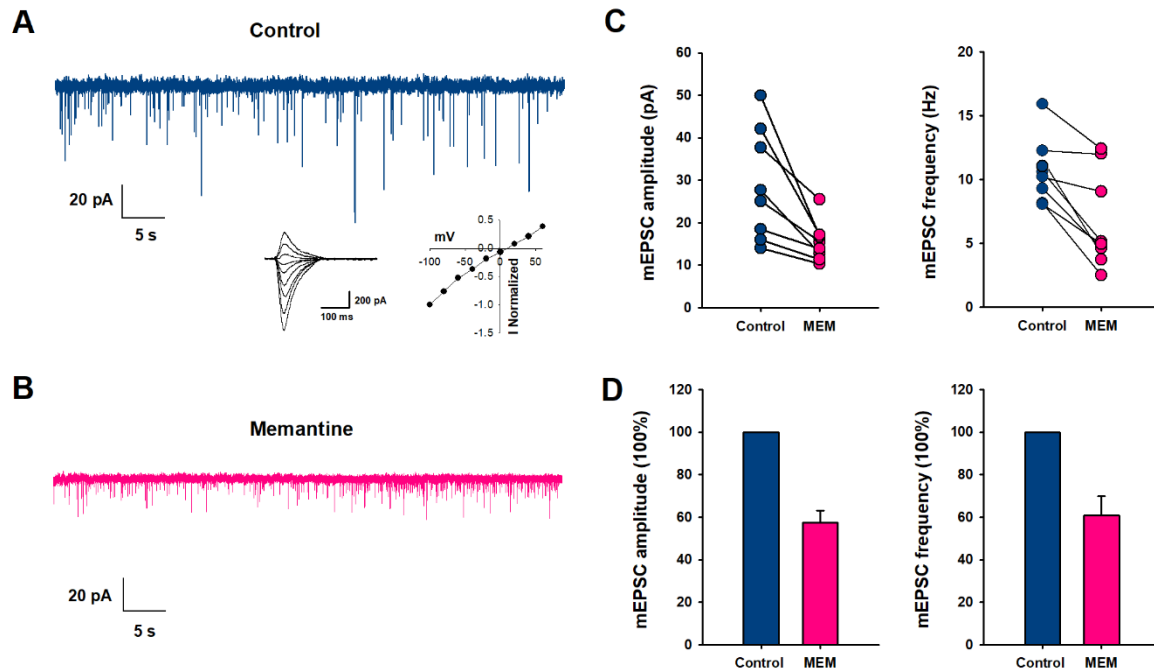

786

787

788 **Fig. S8. mEPSCs inhibition by 500  $\mu$ M of Memantine (MEM).** (A) Representative  
789 spontaneous mEPSCs, in control (blue) and (B) in the presence of 500  $\mu$ M of Memantine (pink).  
790 Inset: Representative currents activated by fast application of 10 mM of glutamate (from -100 to  
791 +60 mV) from hippocampus neurons. (C) mEPSC amplitude and frequency were measured from  
792 individual neurons. Paired data from each experiment are connected by a line. (D) Bar graphs of  
793 the average values of the normalized mEPSC amplitude and frequency, in control (blue) and in  
794 the presence of 500  $\mu$ M of Memantine (pink).

795

796

797

798

799

800

801

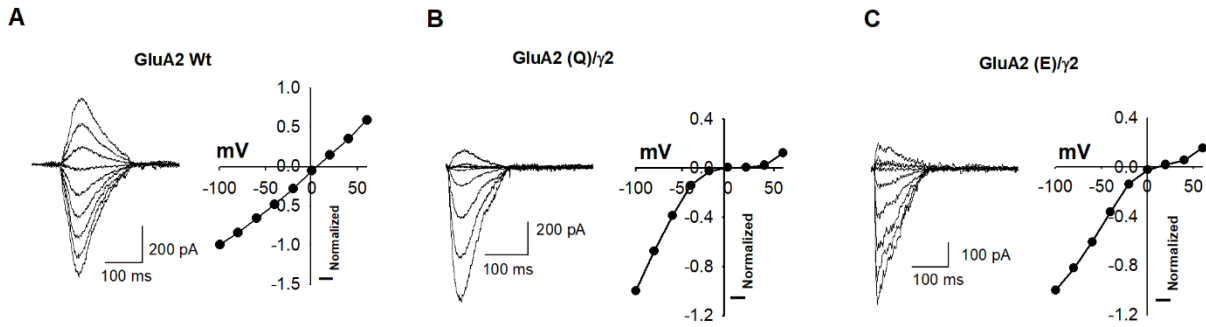

802

803 **Figure S9. Rectification of synaptic AMPA receptors.** Representative currents activated by  
804 fast application of 10 mM of glutamate (from -100 to +60 mV) from hippocampus neurons in  
805 native conditions (A), and hippocampus neurons transfected with GluA2 (Q)/γ2 (B) and GluA2  
806 (E)/γ2 (C).

807

808

809 **Table S1**

810

|                                      |                                                                 |           |                                                                 |           |
|--------------------------------------|-----------------------------------------------------------------|-----------|-----------------------------------------------------------------|-----------|
| Calibrated pixel size (Å)            | 0.93                                                            |           |                                                                 |           |
| Total Exposure (e/Å <sup>2</sup> )   | 40                                                              |           |                                                                 |           |
| Micrographs (#)                      | 7,009                                                           |           |                                                                 |           |
| Starting particle images             | 2,741,415 Particles                                             |           |                                                                 |           |
| Image analysis software              | <i>cryoSPARC 4.5.1</i>                                          |           |                                                                 |           |
| <b>Cryo-EM maps</b>                  | GluA2-γ <sub>2</sub> <sup>mem</sup>                             |           | GluA2-γ <sub>2</sub> <sup>open</sup>                            |           |
|                                      | AMPAR TMD                                                       | Full      | AMPAR TMD                                                       | Full      |
| EMDB ID                              | EMD-XXXX                                                        |           | EMD-XXXX                                                        |           |
| Particle images contributing to maps | 36,557                                                          | 36,557    | 87,724                                                          | 87,724    |
| Global resolution (FSC = 0.143, Å)   | 3.9                                                             | 4.3       | 2.7                                                             | 3.7       |
| Resolution range (Å)                 | 5.0 – 3.0                                                       | 8.4 – 2.6 | 4.0 – 2.0                                                       | 7.1 – 2.2 |
| <i>Model Building</i>                |                                                                 |           |                                                                 |           |
| Associated PDB ID                    | XXXX                                                            |           | XXXX                                                            |           |
| Software                             | <i>Phenix 1.21.1, Coot 0.9.8.92, Isold 1.7e, ChimeraX 1.6.1</i> |           | <i>Phenix 1.21.1, Coot 0.9.8.92, Isold 1.7e, ChimeraX 1.6.1</i> |           |
| Protein residues                     | 3954                                                            |           | 3954                                                            |           |
| Ligand                               | 4 Glu                                                           |           | 4 Glu                                                           |           |
|                                      | 4 CTZ                                                           |           | 4 CTZ                                                           |           |
|                                      | 1 Mem                                                           |           | 0 Mem                                                           |           |
| RMSD bond length (Å)                 | 0.015                                                           |           | 0.015                                                           |           |
| RMSD bond angle (°)                  | 0.76                                                            |           | 0.69                                                            |           |
| Ramachandran outliers (%)            | 0.18%                                                           |           | 0.08%                                                           |           |
| Ramachandran favored (%)             | 93.01%                                                          |           | 92.46                                                           |           |
| Rotamer outliers (%)                 | 0                                                               |           | 0.03%                                                           |           |
| Clashscore                           | 6.63                                                            |           | 6.86                                                            |           |
| MolProbity score                     | 1.81                                                            |           | 1.85                                                            |           |

811
